# Supplementary material
Source: Springer Nature journal article supplement (https://www.springermedizin.de/resource/supplementary/12935_2013_408_MOESM4_ESM.pdf/9540436)

Cell cycle effect of PEITC and Taxol on MCF7 cells

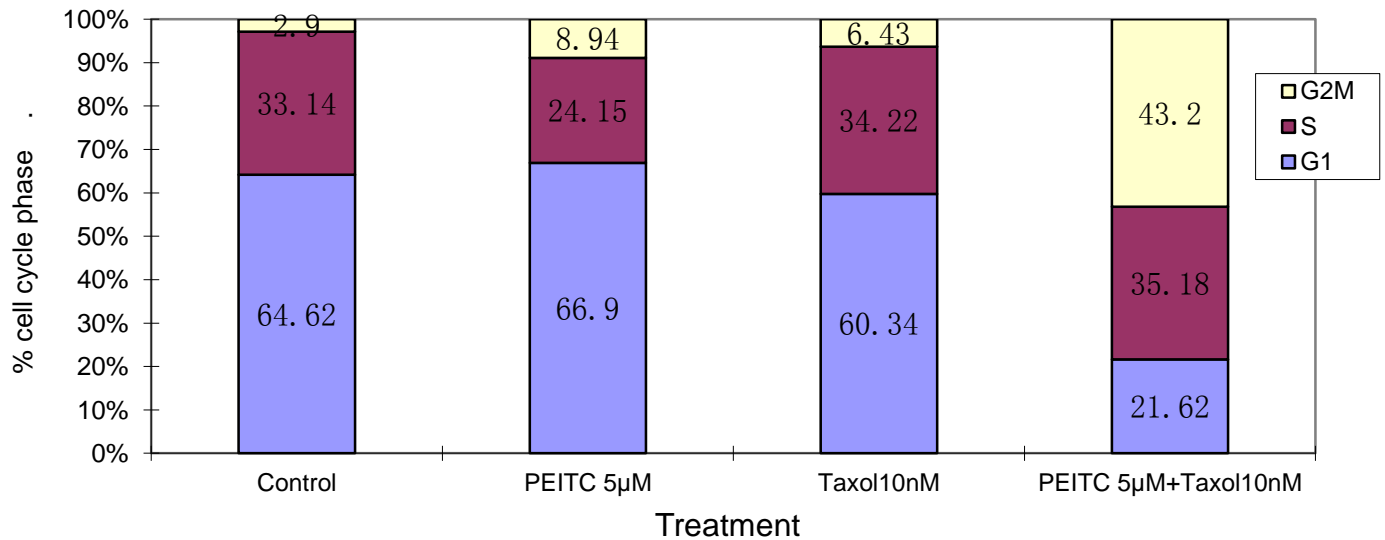

Cell cycle effect of PEITC and Taxol on MDA-MB-231 cells

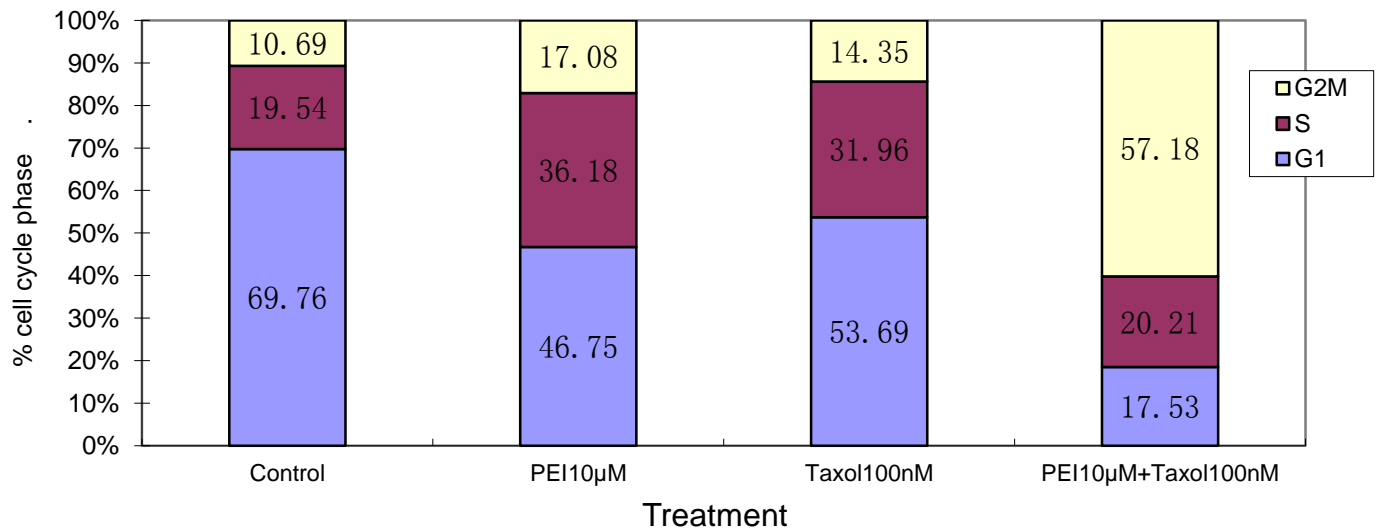

Supplement: MOESM4 [file 9540436]
